# Avances en Iber para la clasificación de balsas: proyecto ACROPOLIS

## *Advancements in Iber for the classification of off-stream reservoirs: ACROPOLIS project*

Marcos Sanz-Ramos <sup>a1\*</sup>, Ernest Bladé <sup>a2</sup>, Nathalia Silva-Cancino <sup>b1</sup> y Fernando Salazar <sup>a3,b2</sup>

<sup>a</sup> Institut Flumen, Universitat Politècnica de Catalunya (UPC) – Centre Internacional de Mètodes Numèrics en Enginyeria (CIMNE), 08034 Barcelona, España.

<sup>b</sup> Centre Internacional de Mètodes Numèrics en Enginyeria (CIMNE), 08034 Barcelona, España.

E-mail: <sup>a1\*</sup>marcos.sanz-ramos@upc.edu, <sup>a2</sup>ernest.blade@upc.edu, <sup>b1</sup>nsilva@cimne.upc.edu, <sup>b2</sup>fsalazar@cimne.upc.edu

\*Autor para correspondencia

Recibido: 30/10/2023

Aceptado: 16/01/2024

Publicado: 31/01/2024

**Citar como:** Sanz-Ramos, M., Bladé, E., Silva-Cancino, N., Salazar, F. 2024. Advancements in Iber for the classification of off-stream reservoirs: ACROPOLIS project. *Ingeniería del agua*, 28(1), 47-63. <https://doi.org/10.4995/ia.2024.20609>

## RESUMEN

Se estima que en España hay alrededor de 70 000 balsas. Según la legislación vigente, usuarios y administraciones tienen la obligación de clasificarlas en función del riesgo potencial frente a una eventual rotura si tienen más de 100 000 m<sup>3</sup> o el dique mide más de 5 m. Con el objetivo de construir un sistema de ayuda para su clasificación que facilite y agilice este proceso, se ha llevado a cabo el proyecto ACROPOLIS. A tal fin, la herramienta de modelización numérica Iber fue elemento esencial y de carácter transversal. Por un lado, el empleo de Iber permitió desarrollar un método simplificado para pre-clasificar balsas en base a técnicas de *machine learning* y, por otro lado, se desarrollaron metodologías ad hoc en Iber que agilizan y automatizan los procesos, como la extracción automática de información hidráulica y de peligrosidad en puntos vulnerables y la paralelización del código para el cálculo mediante técnicas de computación de alto rendimiento.

**Palabras clave** | riesgo de inundación; balsas; machine learning; computación de alto rendimiento; Iber.

## ABSTRACT

*In Spain there are around 70 000 reservoirs. According to current legislation, users and administrations are obligated to classify them based on the potential risk in the event of a rupture, if they have more than 100 000 m<sup>3</sup> or the dam height exceeds 5 m. With the aim of creating a support system for their classification that facilitates and expedites this process, the ACROPOLIS project has been carried out. To this end, the numerical modelling tool Iber played an essential and cross-cutting role. On one hand, the use of Iber allowed for the development of a simplified method for pre-classifying reservoirs based on machine learning techniques. On the other hand, ad hoc methodologies were developed in Iber to streamline and automate processes, such as the automatic extraction of hydraulic and hazard information at vulnerable points, and the parallelization of the code for computation using high-performance computing techniques.*

**Key words** | flood risk; off-stream reservoirs; machine learning; high performance computing; Iber.

## INTRODUCCIÓN

Las balsas son estructuras, comúnmente construidas de materiales sueltos, que están diseñadas para el almacenamiento de cualquier tipo de fluido, tanto Newtoniano –generalmente considerado el ‘agua’– como no-Newtoniano –p.ej. relaves mineros– (Sánchez-Romero *et al.*, 2019; Sanz-Ramos *et al.*, 2021b; Soler-Guitart *et al.*, 2010). Son estructuras versátiles y esenciales para diferentes propósitos, como el riego, el abastecimiento de agua a pequeñas poblaciones, la extinción de incendios, la depuración de aguas y decantación de aguas contaminadas, la acumulación de relaves mineros, el almacenaje de energía potencial en instalaciones eléctricas, entre otros usos (Bladé *et al.*, 2019b; Nguyen, 2023; Sahoo *et al.*, 2021; Sanz-Ramos *et al.*, 2021b, 2022a).

Se estima que en España hay alrededor de 70 000 balsas, de las cuales 16 000 se encontrarían en Andalucía (JA, 2010), 3500 en la Comunidad Valencia y 2700 en Alicante (de Cea, 2021). La mayoría de balsas están localizadas en elevaciones altas, en zonas agrícolas, cerca de zonas urbanas o de infraestructuras importantes (de Cea, 2021), para así proporcionar el fluido por gravedad. Aunque las balsas no están afectadas directamente por las condiciones hidrológicas de la cuenca, éstas pueden fallar o presentar un mal funcionamiento debido a falta de mantenimiento, fallos en la construcción o en la explotación (MTERD, 2019). Los mecanismos de fallo habituales en diques de materiales sueltos son por deslizamiento, erosión interna o sobrevertido (Orozco Rivas y Berezowsky, 2000), siendo este último en el caso de balsas por precipitación endógena o mal funcionamiento del sistema de alimentación. Por lo general, las balsas presentan un mal funcionamiento por modos de fallo asociados a la erosión interna, como la tubificación, al contrario que las presas cuyo principal modo de fallo es el sobrevertido (SEIASA, 2021). En cualquier caso, los riesgos y daños producidos por la inundación en caso de una eventual rotura de la balsa pueden verse acrecentados debido al incremento de la vulnerabilidad y la exposición por la existencia o construcción de una nueva balsa (Brath *et al.*, 2006; Roy *et al.*, 2021; Schultz, 2008; Singh y Singh, 2011).

La modificación del Reglamento del Dominio Público Hidráulico español (Real Decreto 9/2008) concretó la obligación de propietarios de presas y balsas de más de 5 m o más de 100 000 m<sup>3</sup>, tanto públicos como privados, de disponer del pertinente estudio de clasificación de presa o balsa en función del riesgo potencial por su rotura (BOE-A-2008-755, 2008, Artículos 356 y 367). Esto supuso un cambio de paradigma importante, ya que con anterioridad tan solo era necesario disponer de dicho estudio en presas de más de 15 m o que tuviesen una capacidad superior a 100 000 m<sup>3</sup> y una altura comprendida entre 10 y 15 m. La actual normativa, además de incluir las balsas, fija unos umbrales mínimos (dimensiones y volumen) para exigir el pertinente estudio sensiblemente inferiores, lo que implica incluir también pequeñas presas y azudes con decenas de años de antigüedad (Sanz-Ramos *et al.*, 2020).

Las balsas se diferencian de las presas porque, principalmente, se ubican fuera de la red de canales de la cuenca y pueden estar delimitadas total o parcialmente por un dique de retención. Ello hace que los estudios de inundabilidad necesarios para poder clasificarlas no sean triviales de realizar porque el proceso de propagación de la onda de avenida es complejo y, en primera instancia, difícilmente determinable (Sanz-Ramos *et al.*, 2023b). Los riesgos asociados al fallo de estas estructuras van desde la propia inundación, tanto en zonas rurales como urbanas, hasta la contaminación del medioambiente dependiendo del tipo de fluido contenido en la balsa. Asimismo, atendiendo a la enorme cantidad de balsas que cumplen con los actuales requisitos para su clasificación en función del riesgo potencial en caso de una eventual rotura o mal funcionamiento, tanto usuarios como administraciones se han visto desbordados por la necesidad de acometer este tipo de estudios.

El proyecto ACROPOLIS pretende dar respuesta a las necesidades actuales con la construcción de un sistema de ayuda para la clasificación de balsas en función del riesgo potencial. El sistema optimiza diversos procesos mediante técnicas de modelización numérica avanzadas, el uso de algoritmos de *machine learning* (ML), la integración de resultados en sistemas de información geográfica (GIS, en sus siglas en inglés) y la gestión de activos de infraestructuras mediante la metodología BIM (*Building Information Modeling*).

El presente artículo aborda los avances realizados en las técnicas de modelización, concretamente en la herramienta de modelización numérica Iber (Bladé *et al.*, 2014a, 2014b). El uso Iber fue esencial y de carácter transversal para la consecución de los objetivos de ACROPOLIS (Figura 1). No solo sirvió para elaborar un método simplificado basado en técnicas de ML, sino que también se han desarrollado nuevas funcionalidades en materia de clasificación de balsas que agilizan y automatizan diversos procesos, así como la paralelización del código para un cálculo de alto rendimiento y resolución. El presente trabajo muestra los avances implementados en Iber, así como su desempeño como herramienta transversal. También se analizan las potencialidades de los nuevos desarrollos y las implicaciones prácticas para la realización de estudios de clasificación de balsas.

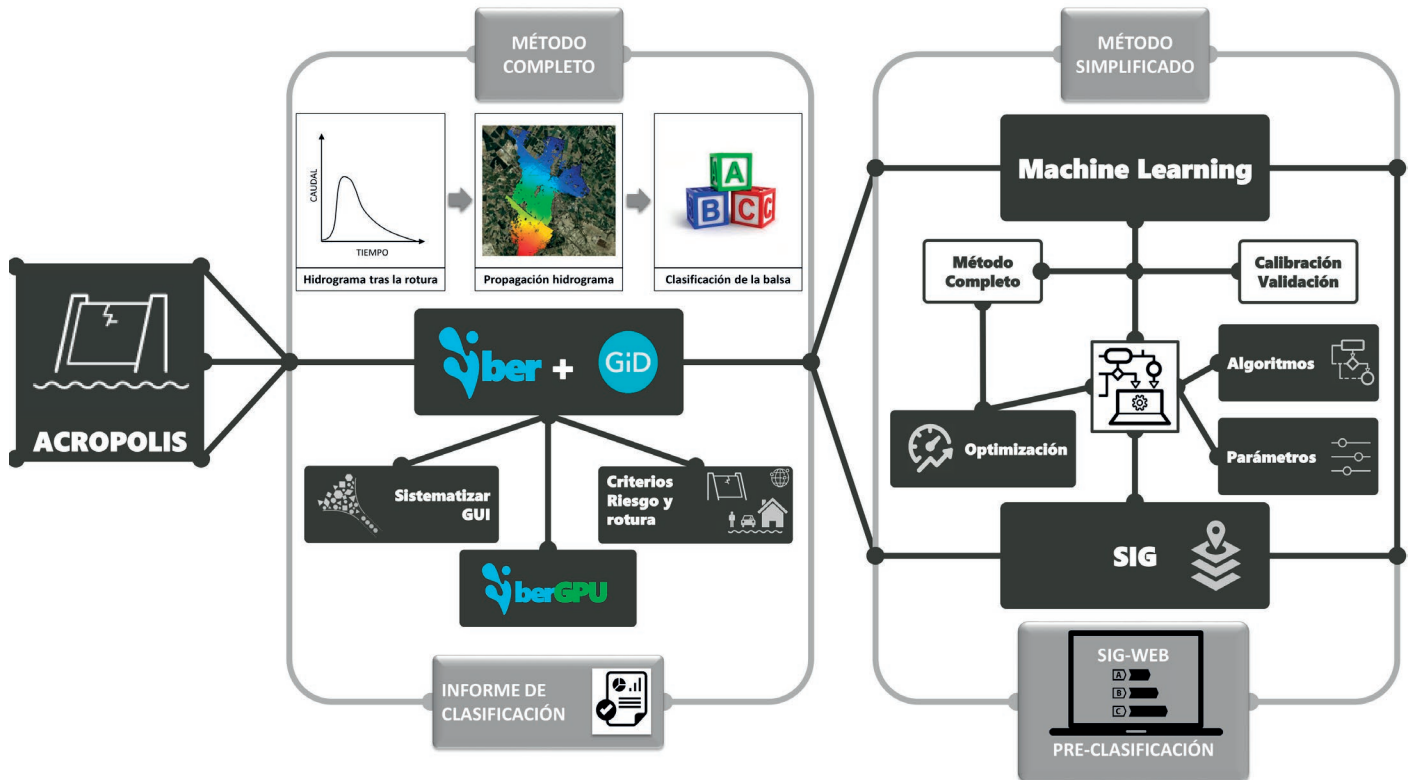

Figura 1 | Esquema conceptual para el desarrollo del proyecto ACROPOLIS.

## MATERIAL Y MÉTODOS

### Marco normativo

Para hacer frente al riesgo de inundación, la Unión Europea (UE) definió el marco legal a través de la Directiva Europea 2007/60/CE de inundaciones (DOUE-L-2007-82010, 2007), y que es de obligado cumplimiento para los países miembros de la UE. El Real Decreto 903/2010 de 9 julio (BOE-A-2010-11184, 2010) es la transposición del estado español de la directiva anterior, y define una serie de procesos para planificar y gestionar el espacio fluvial y el riesgo de inundación.

Los planes de gestión del riesgo de inundación (PGRI) son herramientas que deben permitir una actuación coordinada de todas las administraciones públicas, así como para con la sociedad, con el fin de reducir las consecuencias negativas de las inundaciones. Sin embargo, estos documentos no contemplan, por el momento, la evaluación de la peligrosidad y el riesgo por inundaciones pluviales (p.ej. zonas urbanas) o de carácter no fluvial (p.ej. rotura de un canal). Tampoco se incluyen las inundaciones producidas por eventos disruptivos, como es el caso de la rotura de una presa o balsa. Éstas se suelen tratar de forma específica mediante una categorización propia de cada país según el riesgo potencial (ICOLD European Club, 2012).

Teniendo en cuenta los daños potenciales causados por un eventual fallo o mal funcionamiento, en España, las presas y balsas deben clasificarse en tres categorías (MITECO, 2021): ‘Categoría A’ cuando la inundación puede afectar gravemente áreas urbanas o servicios esenciales o causar daños materiales o ambientales significativos; ‘Categoría B’ cuando la inundación cause daños materiales o ambientales significativos o afecte a un número reducido de viviendas; y ‘Categoría C’, la inundación puede causar daños materiales o ambientales de importancia moderada y solo pérdidas de vidas incidentales.

El análisis de la peligrosidad y el riesgo de inundación por una eventual rotura de una presa o balsa se regula a través de la “Directriz Básica de Planificación de Protección Civil ante el Riesgo de Inundaciones” (BOE-A-1995-3865, 1995) y del “Reglamento Técnico sobre Seguridad de Presas y Embalses” (BOE-A-1996-7319, 1996). La peligrosidad para la vida humana se evalúa en función de la profundidad y la velocidad de la corriente durante la eventual inundación. Se define una situación de ‘afección grave’ en áreas no urbanas cuando la profundidad del agua ( $h$ ) es superior a 1 m, la velocidad del flujo ( $v$ ) es superior a 1 m/s, o el producto de ambas variables ( $h \cdot v$ ) es superior a 0,5 m<sup>2</sup>/s.

Este criterio, que se define para escenarios deterministas (Sanz-Ramos *et al.*, 2023b), se diferencia del criterio definido en la Guía Técnica anterior (MMA, 1996) para actualmente coincidir con lo establecido en el RD 9/2008. Este es el mismo criterio que el empleado para la zonificación de inundación peligrosa (Sanz-Ramos *et al.*, 2020a), lo que puede posibilitar la integración de este tipo de estudios con los actuales PGRI de forma homogénea.

Otro de los cambios producidos entre la versión de 1996 y de 2021 de la Guía Técnica es la homogeneización del proceso para llevar a cabo la clasificación, siendo, a priori, no necesarios otros documentos (p.ej. ACA, 2014) para interpretar la actual Guía Técnica. En la versión de 1996 se contemplaban hasta 4 métodos diferentes de clasificación, siendo 3 de ellos considerados como ‘simplificados’. En la actual versión de 2021 se descartan dichos métodos simplificados, siendo el denominado ‘método completo’ el que se debe emplear, y que se basa en la aplicación de herramientas de modelización hidráulica. Empero, se hace mención a la creciente utilización de otras metodologías alternativas, como por ejemplo las basadas en técnicas de *machine learning*.

## Herramienta de modelización numérica: Iber

Iber una herramienta de modelización numérica originariamente desarrollada para la propagación de avenidas y procesos morfodinámicos (Bladé *et al.*, 2014a, 2014b, 2019a, 2019b; Sanz-Ramos *et al.*, 2020a). Eminentemente desarrollada con fines prácticos, sigue siendo una herramienta con carácter experimental que permite acoger nuevas funcionalidades, tanto numéricas como en la interfaz de usuario (Coll *et al.*, 2018; Sanz-Ramos *et al.*, 2022b).

Actualmente, se trata de un programa de cálculo que, en base a la resolución de las ecuaciones de aguas poco profundas mediante un esquema de volúmenes finitos, también permite simular procesos de transporte de sedimentos y erosión de suelos, procesos hidrológicos (Cea y Bladé, 2015; García-Alén *et al.*, 2023; Sanz-Ramos *et al.*, 2020b, 2021c, 2022c), la propagación de contaminantes (Anta-Álvarez *et al.*, 2015; Cea *et al.*, 2016), el transporte de madera (Ruiz-Villanueva *et al.*, 2014), procesos eco-hidráulicos (Sanz-Ramos *et al.*, 2019, 2023c), la modelización de fluidos no-Newtonianos (Ruiz-Villanueva *et al.*, 2019; Sanz-Ramos *et al.*, 2021a, 2023a) y la simulación de inundaciones pluviales (Aranda *et al.*, 2021, 2023; Sañudo *et al.*, 2020).

Desde sus primeras versiones, Iber incluye una herramienta específica para simular la formación de brechas en diques. Ello le confiere la posibilidad de simular, conjuntamente, uno de los modos de fallo (sobrevvertido) y la subsiguiente propagación de la onda de avenida en el dominio de cálculo. La brecha en el dique se genera numéricamente siguiendo una geometría trapezoidal según las especificaciones de la Guía Técnica, o según especificaciones personalizadas. Una vez que se activa una brecha en el modelo, el terreno evoluciona generando una sección de forma trapezoidal a lo largo de un eje de generatriz. Una descripción detallada de este proceso se muestra en Sanz-Ramos *et al.* (2023b).

Las herramientas numéricas de modelización hidráulica, aun permitiendo simular procesos físicos complejos de manera relativamente rápida y eficaz, representan una simplificación de la realidad. A pesar de ello, para ser de utilidad, deben desarrollarse en concordancia con la normativa vigente y deben permitir la consecución de los objetivos para hacer frente al riesgo de inundación. Esto es lo que se ha pretendido con el desarrollo del proyecto ACROPOLIS, donde el uso de Iber no se ha limitado a la realización del pertinente estudio de inundabilidad para la clasificación de balsas. Iber no solo se ha empleado como base para desarrollar una nueva metodología simplificada para la pre-clasificación de balsas, sino que también se ha mejorado el flujo de trabajo, se han ampliado y mejorado las capacidades para la extracción de resultados y, además, se han implementado técnicas de computación de alto rendimiento para reducir los tiempos de cálculo.

## DESARROLLOS Y UTILIDAD

### Computación de alto rendimiento

Iber nació como una herramienta de simulación hidráulica cuya principal aplicación era la propagación de ondas de avenida en dos dimensiones y régimen no-permanente. Este crecimiento ha priorizado la multidisciplinariedad e integración de módulos de cálculo frente a la optimización del código y el uso de técnicas de computación de alto rendimiento (HPC, en sus siglas en inglés). En particular, los actuales desarrollos en HPC se centran en la paralelización de códigos de cálculo para aprovechar las potencialidades de las tarjetas gráficas (GPU, en sus siglas en inglés), ya que éstas tienen varios órdenes de magnitud más procesadores que la unidad de computación de un ordenador convencional (CPU, en sus siglas en inglés).

Iber ya cuenta con una versión paralelizada para la resolución de la hidrodinámica y procesos hidrológicos (García-Feal *et al.*, 2018), de procesos de transporte de contaminantes y sedimentos, pero no disponía de una versión que integrase el proceso de formación de la brecha y propagación de avenidas. Si bien la primera versión paralelizada de Iber está programada en CUDA C++, el código original y todos los desarrollos que se llevan a cabo en Iber se siguen realizando en Fortran. Para evitar este proceso de traducción, en el proyecto ACROPOLIS se decidió desarrollar el código en CUDA Fortran (NVIDIA, 2022a, 2022b), un lenguaje de programación similar a Fortran pero que permite el cálculo con GPU. Una descripción detallada del proceso de paralelización, y su particular aplicación como herramienta eco-hidráulica, puede encontrarse en Sanz-Ramos *et al.* (2023a), mientras que la implementación y aplicación de este código en rotura de balsas puede hallarse en Sanz-Ramos *et al.* (2023b).

Este desarrollo permite no solo reducir los tiempos de cálculo de días u horas a pocos minutos o segundos, sino también incrementar notablemente la resolución de los modelos numéricos manteniendo, igualmente, tiempos de computación asequibles. Para realizar simulaciones con tiempos de cálculo resolutiveos con el cálculo secuencial (basado en CPU) era necesario emplear, para ello, una densidad de elementos de cálculo de decenas o pocos cientos de elementos por hectárea (Sanz-Ramos *et al.*, 2020a). La versión actual de Iber permite realizar simulaciones con densidades varios órdenes de magnitud superiores manteniendo, igualmente, tiempos de computación reducidos.

Asimismo, es habitual realizar una única simulación por tarjeta gráfica, ya que el cálculo de diversas simulaciones en una misma GPU, o CPU, ralentiza el tiempo de cálculo global considerablemente (Morales-Hernández *et al.*, 2021). Esto puede suponer un hándicap en cálculos multi-escenario como el de la clasificación de presas y balsas, cuya zona de rotura puede no ser del todo clara (Sanz-Ramos *et al.*, 2023b) y, por tanto, las afecciones pueden no evaluarse adecuadamente (Martínez-Gomariz *et al.*, 2023). Es por ello que, si el/la usuario/a dispone varias GPU en su computadora, o de un clúster de GPUs, tan solo tiene que indicar su identificador y el programa lanzará el cálculo de cada escenario de manera simultánea en las diferentes GPUs que disponga.

### Clasificación de balsas mediante algoritmos de *machine learning*

El uso de la inteligencia artificial (IA) está cada vez más extendido y actualmente abarca casi todos los ámbitos de la ingeniería (Bonakdari *et al.*, 2020; Díez-Herrero y Garrote, 2020; Hooshyaripor *et al.*, 2015; Salazar *et al.*, 2015, 2016; Zhu *et al.*, 2019). Estas técnicas permiten, con un coste relativamente bajo, predecir el comportamiento de variables en procesos complejos, como es el caso de las inundaciones (Hooshyaripor *et al.*, 2015; Motta *et al.*, 2021; Sachdeva *et al.*, 2017). Sin embargo, su desarrollo suele requerir de grandes cantidades de datos para calibrar el modelo. Es aquí donde las herramientas de modelización deben ser capaces de realizar grandes cantidades de cálculos en tiempos relativamente cortos, e Iber ya se ha mostrado una herramienta eficaz en este aspecto (Bermúdez *et al.*, 2021; Farfán y Cea, 2021, 2022; Silva-Cancino *et al.*, 2022).

Uno de los objetivos del proyecto ACROPOLIS fue el desarrollo de una herramienta de pre-clasificación basada en técnicas de *machine learning* (ML) que permitiera obtener, con relativamente poca información, la categoría de la balsa sin necesidad de elaborar el estudio de inundabilidad. La principal finalidad de construir algoritmos usando ML es producir un sistema que permita generar resultados con un elevado grado de acierto con datos nunca antes vistos. Para ello es necesario identificar patrones a partir de una base de datos masiva, que en el caso de ACROPOLIS fueron las variables hidráulicas calado y velocidad del proceso de inundación. Es aquí donde Iber se empleó como herramienta transversal.

Para ello, se creó una funcionalidad que permite generar modelos de Iber de forma automática en base a unos datos básicos de entrada (Figura 2). El algoritmo, creado directamente en la interfaz de Iber, GiD, permite la construcción de modelos numéricos mediante la importación de las coordenadas XYZ de los puntos, que han sido previamente definidos en base a la parametrización de la zona de estudio. A partir de esta nube de puntos se realiza una triangulación para conformar la geometría del modelo, que está dividida en 3 zonas: la primera, donde se ubica la balsa; la segunda, una zona de transición sin cauce definido; y la tercera, una zona donde la avenida tiende a encauzarse, ya sea por pendientes laterales o por la existencia de un cauce. A continuación, se implementan los parámetros hidráulicos esenciales (condiciones iniciales y de contorno, rugosidad, etc.), así como los parámetros de tiempo, que son función del tipo de geometría y dimensiones del modelo. Finalmente, se importan los parámetros de la brecha y los puntos vulnerables (coordenadas XY del dominio de cálculo), aleatoriamente distribuidos, de los que extraer las variables hidráulicas (calado y velocidad) para evaluar la peligrosidad. Tras generar la malla de cálculo, se lanzan las simulaciones en cascada: una vez concluida una simulación, se crea el siguiente modelo y se lanza la nueva simulación. Todo ello se llevó a cabo en un tiempo promedio inferior a 4 s por modelo, incluido el cálculo, que ha sido paralelizado mediante el uso de técnicas de computación de alto rendimiento (Sanz-Ramos *et al.*, 2023c).

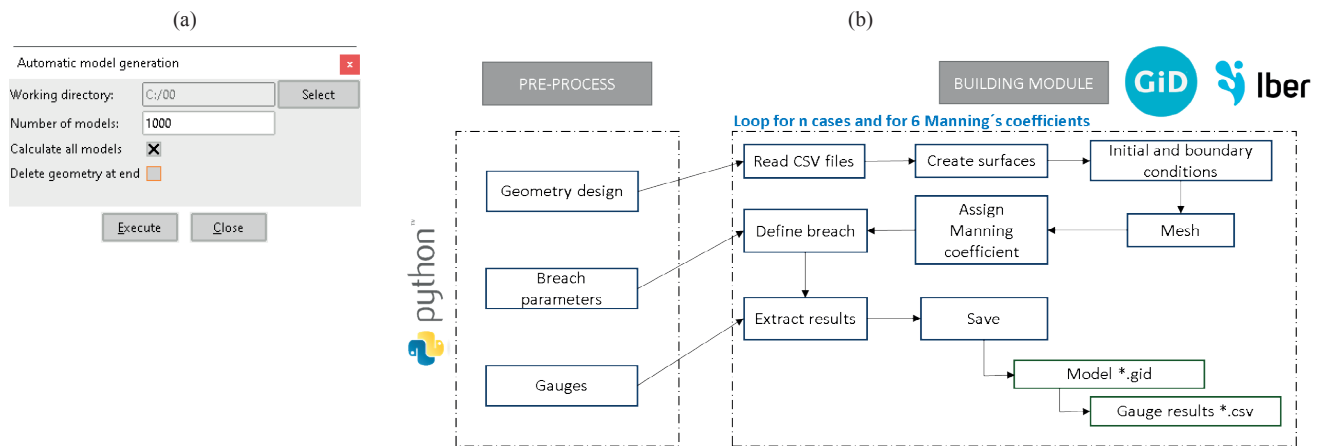

**Figura 2** | (a) Ventana para la generación de casos de forma masiva. (b) Esquema de funcionamiento para la construcción, cálculo de los modelos numéricos y extracción de resultados.

Este desarrollo sirvió para entrenar un modelo subrogado basado en ML con datos obtenidos de 1200 casos hidráulicos bidimensionales sintéticos. Para cada modelo, se distribuyeron aleatoriamente 200 puntos vulnerables dentro del dominio computacional. Una vez calculados, se extrajeron las variables hidráulicas proporcionando una base de datos de 240 000 puntos clasificados como de 'afección grave' y 'afección no grave' según la Guía Técnica para áreas no urbanas. Durante el proceso de validación, realizado en otros tantos modelos sintéticos con alrededor de 24.000 puntos vulnerables, se obtuvo un nivel de acierto superior al 80%. Una descripción detallada del modelo de ML puede hallarse en Silva-Cancino *et al.* (2022).

## Intercambio con GIS y BIM

Iber es una herramienta de modelización numérica que usa como interfaz de usuario el programa de pre- y post-proceso GiD. El desarrollo de ambos ha ido de la mano, evolucionando tanto de forma simultánea como en paralelo para hacer de la experiencia del/la usuario/a un proceso más amigable y sencilla.

Aunque los modelos numéricos de Iber se pueden generar íntegramente desde su propia interfaz, es habitual que usuarios y usuarias empleen sistemas de información geográfica (GIS, en sus siglas en inglés) para conformar algunos de sus elementos básicos. Tales elementos suelen ser: la geometría o malla de cálculo del modelo, el mapa de usos del suelo, la imagen de fondo, entre otros datos georreferenciados.

El proyecto ACROPOLIS se ha beneficiado, por un lado, de desarrollos secundarios de la interfaz, como serían las mejoras en la importación de archivos CAD y, sobre todo, Shapefile (Figura 3a). Con este último formato se permite la importación no

solo de la geometría del modelo, sino también las condiciones numéricas asociadas a la tabla de atributos del propio elemento de geometría. También se permite la importación, tanto de geometrías como de mallas de cálculo (Figura 3b), mediante rasters del terreno (p.ej. modelos digitales del terreno, o MDT) procesados con librerías GDAL, lo que supone poder aprovechar la información del raster de forma íntegra (un elemento de cálculo por cada celda/pixel del raster). Otra opción de utilidad para la generación de modelos es la importación de geometrías/mallas a partir de datos topográficos OpenSource a nivel mundial (Figura 3c).

En cuanto al post-proceso, Iber permite la extracción de resultados de diversas formas y formatos. La conexión con GIS se ha realizado tradicionalmente con la extracción de resultados mediante archivos rasters. Los resultados exportables se tenían que seleccionar dentro de una lista predefinida, y que no incluía todos los resultados seleccionados por el/la usuario/a en las opciones de cálculo. Por consiguiente, su versatilidad era limitada.

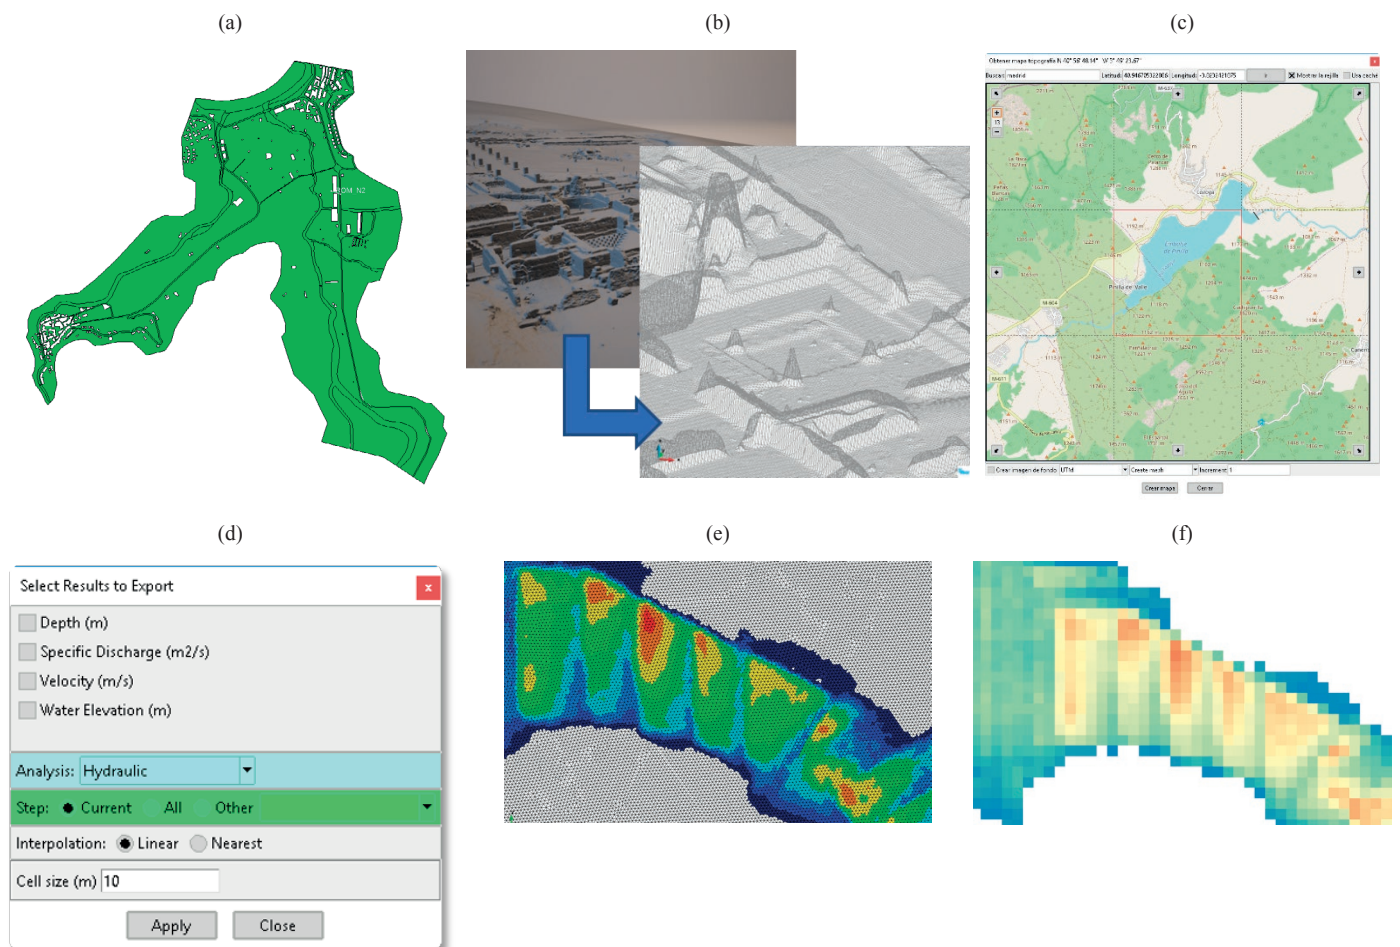

**Figura 3** | (a) Geometría generada en GIS e importada directamente en Iber. (b) Raster tratado con la librería GDAL e importado a Iber directamente como malla de cálculo. (c) Ventana de importación de topografía mundial OpenSource. (d) Nueva ventana para la exportación de cualquier resultado calculado a raster. (e) Resultados en formato Shapefile. (f) Resultados en formato raster.

Asimismo, la integración con BIM, por su propia estructura, no resulta sencilla a partir de rasters de resultados. Si bien los datos rasters se pueden convertir en elementos de geometría con información del pixel como dato para BIM, este proceso no es trivial, necesita de terceros programas, y requiere necesariamente de un proceso de interpolación entre los datos de la malla de cálculo y el raster.

Es por ello que se ha modificado el código interno de Iber para poder exportar todos los resultados seleccionados en pre-proceso, incluidos los correspondientes a nuevos módulos, así como aquellos generados directamente en el post-proceso. De este modo se elimina la limitación en cuanto a la extracción de resultados. Del mismo modo, se ha generado una nueva ventana que permite seleccionar diversos resultados para la extracción del instante de tiempo que se esté visualizando, cualquier otro o todos ellos (Figura 3d). Además de agilizar todo el proceso de extracción de resultados tipo raster, esta nueva opción da mayor versatilidad al/la usuario/a y mejora considerablemente el flujo de trabajo.

La integración de los resultados con BIM se ha solventado empleando las funcionalidades de los archivos en formato Shapefile, exportando directamente la malla de cálculo como elementos de la geometría del Shapefile y en cuya tabla de atributos se guarda la información de los resultados de cada elemento de la malla (Figura 3e). Esto supone no solo una mejora para con la conexión con BIM, sino también con GIS, ya que esta forma de extraer los resultados es mucho más rica que el uso de rasters y no requiere de la interpolación elemento de la malla–celda del raster (Figura 3f).

### Flujo de trabajo y funcionalidades de la opción ‘brecha’

Desde su lanzamiento en 2010, y atendiendo a la normativa vigente de referencia para la evaluación de la peligrosidad y del riesgo de inundación, Iber incorpora la posibilidad de modificar la malla de cálculo para simular la formación de una brecha en un dique. Con ello, es posible evaluar el riesgo potencial que supondría la propagación de la onda de avenida en caso de rotura de una presa o balsa. Esta opción no se puso a disposición de los usuarios hasta que el proceso se validó (Cea *et al.*, 2014; Fuentes-Mariles *et al.*, 2010), siendo de libre utilización a partir de la versión 2.0 de Iber (publicada en noviembre de 2013).

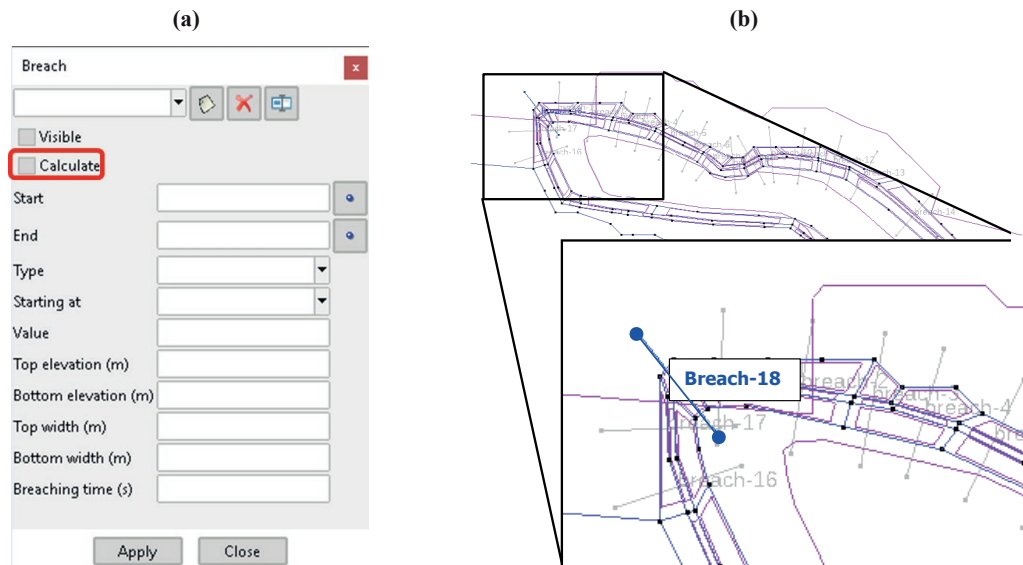

**Figura 4 |** (a) Nueva ventana para la definición de los parámetros de la brecha, tipo de brecha y cálculo. (b) Ejemplo de un modelo numérico con diversas brechas definidas automáticamente mediante la selección del dique norte de la balsa: las brechas inactivas permanecen en gris; las brechas activas (p.ej. ‘breach-18’), se muestran en azul (la brecha activa se ha resaltado con fines visuales).

Hasta la fecha, todas las herramientas y opciones disponibles en Iber se basaban en la Guía Técnica de 1996. En este particular, el flujo de trabajo requería de 2 pasos: el primero, definir los parámetros de cálculo; y el segundo, habilitar la formación de la brecha. El segundo de los pasos era crítico y, en muchas ocasiones, el/la usuario/a omitía indicarlo, por lo que la simulación se realizaba sin que se formase la brecha en el dique de la presa o balsa. El agua no fluía y, por tanto, suponía una inversión vana de tiempo y esfuerzo. Este diseño estaba orientado a que el/la usuario/a realizase la rotura de forma consciente y, además, permitiese



la formación de brechas de forma concatenada en diques (mejora llevada a cabo en versiones posteriores). Sin embargo, no era un flujo de trabajo ágil ni versátil.

Es por ello que en la versión actual de Iber la activación de la formación de la brecha se ha desacoplado de las opciones de cálculo. Ahora el/la usuario/a tiene que indicar si quiere o no que se forme la brecha en la misma ventana donde se introducen las características de la misma (Figura 4a). Es decir, el cálculo de una brecha pasa a ser un paso más del pre-proceso durante la generación del modelo. Asimismo, toda brecha cuyo cálculo está activo se muestra en color azul, mientras que las brechas inactivas –o sin la opción “Calcular” activada– se muestran de color gris (Figura 4b).

Esta nueva funcionalidad, además de mejorar el flujo de trabajo con la eliminación de un paso adicional (incluso crítico), permite al/la usuario/a ser consciente de qué brecha se va a calcular y brinda la posibilidad de realizar un análisis multi-criterio empleando el mismo modelo sin necesidad volverlo a generar (Sanz-Ramos *et al.*, 2023b).

## Generación de informes

El análisis de datos y la generación de informes de clasificación de presas y balsas es, habitualmente, un proceso que requiere un esfuerzo temporal grande, sobre todo si el número de elementos vulnerables a analizar es considerable. Tradicionalmente este análisis se llevaba a cabo o bien desde el propio Iber o bien desde un GIS, lo que requería, por un lado, tiempo y, por otro lado, el conocimiento de un tercer programa.

La Guía Técnica sugiere la realización de informes de clasificación de balsas y presas con un contenido determinado. Sin embargo, no existe obligatoriedad de seguir el estilo y estructura indicados. Es por ello que, con el fin de agilizar el proceso de extracción de resultados, se ha optado por desarrollar en Iber dos métodos de generación de informes para que el/la usuario/a emplee el que más le interese y, si lo desea, sirva para alimentar un documento en el formato propuesto por la Guía Técnica.

Por un lado, el denominado ‘Informe Básico’ es una herramienta que, de forma automática, extrae una captura de pantalla de cada punto vulnerable considerando la visualización actual o el mapa de máximos de la inundación. Las imágenes se extraen con el zoom indicado por el usuario y en coordenadas georreferenciadas. Asimismo, se generan, también de forma automática, las gráficas de evolución de las variables hidráulicas ‘Calado’, ‘Velocidad’ y ‘Caudal específico’ del flujo a lo largo de la simulación. Todo ello en formato \*.grf, por lo que se pueden ver directamente en Iber. Toda esta información se guarda en la carpeta del propio modelo para que sea utilizada con posterioridad.

El ‘Informe Extendido’ agrupa la información anterior en un documento en formato HTML (tipo web). Por tanto, es necesario extraer primero los datos del ‘Informe Básico’ para generarlo. La ventana de generación del informe muestra al/la usuario/a información básica del modelo (editable), la posibilidad de incluir un resumen de las características del modelo (ubicación del modelo, número de elementos, características de la geometría, etc.) y toda la información generada en el ‘Informe Básico’ que se va a incluir. Por defecto se cargan todos los resultados del ‘Informe Básico’, pero se puede modificar según convenga. En el siguiente link se encuentra un ejemplo del funcionamiento la nueva funcionalidad ‘Informes’ desarrollada en Iber: <https://youtu.be/VmvAczUokHU>.

---

## DISCUSIÓN Y POTENCIALES APLICACIONES

### ACROPOLIS para la clasificación de balsas

Todos los desarrollos anteriormente mencionados, que son extrapolables a otro tipo de inundaciones (p.ej. rotura de presas, canales, balsas de relaves mineros, etc.), se pusieron a prueba en diversos casos de estudio seleccionados para su demostración dentro del proyecto ACROPOLIS (Sanz-Ramos *et al.*, 2023b; Silva-Cancino *et al.*, 2022). En cada uno de ellos se pudo construir un modelo numérico de alta resolución y prestaciones, con densidades de alrededor de 1000 elementos por hectárea, y tiempos de computación inferiores a los 10 minutos gracias a la utilización de técnicas de computación de alto rendimiento. Si se aplican las recomendaciones de la Guía Técnica actual para con las características de la malla de cálculo (apartado 3.5.1), y teniendo en

cuenta que los modelos digitales del terreno a nivel estatal tienen un paso de celda de 2 metros (IGN, 2022), las zonas de estudio pueden discretizarse en varios millones de elementos. En estos casos, con densidades superiores a los 5000 elementos por hectárea, los tiempos de computación siguen siendo asequibles, con valores inferiores a la hora de cálculo. En este caso, el cálculo con GPU permitió obtener aceleraciones superiores a x85 respecto a la versión de CPU (Sanz-Ramos *et al.*, 2023b).

Por otro lado, la utilización de Iber se ha mostrado eficaz para el desarrollo de un nuevo sistema de pre-clasificación de balsas basado en algoritmos de *machine learning*. Las necesidades de generación de casos de estudio simplificados de forma masiva, así como su cálculo mediante GPU y la extracción de resultados, se vieron cumplidas gracias a la adaptabilidad y versatilidad de la herramienta. El análisis de datos permitió conocer las variables que mayor influencia tienen a la hora de definir un punto vulnerable como ‘afección grave’. Como era de esperar, la distancia al punto de rotura y la rugosidad son los parámetros que mayor importancia tienen, con una relevancia superior al 70%. La geometría del cauce, por el contrario, tiene poca relevancia (<5%). Esto enfatiza la fiabilidad del modelo de *machine learning*, ya que responde adecuadamente a las casuísticas habituales de este tipo de inundaciones, donde el terreno es altamente antrópico (suavizado de taludes, cambio de la red de drenaje natural, conformado de terrazas, etc.) y concuerda con los resultados observados con Iber en los casos de aplicación (Silva-Cancino *et al.*, 2022).

La integración de Iber, y GiD, con herramientas GIS está en concordancia con los actuales estándares y metodologías para con la construcción de modelos numéricos y el análisis de resultados. Asimismo, el proyecto ACROPOLIS se benefició de herramientas ya existentes en Iber, como es la funcionalidad desarrollada por el Centro de Estudios y Experimentación de Obras Públicas que permite utilizar datos LiDAR del Instituto Geográfico Nacional (CEDEX, 2020). Con ella no solo se pueden descomprimir los archivos \*.laz que contienen la nube de puntos LiDAR en formato \*.las, sino que también se puede generar un modelo digital del terreno de un paso de celda de 2 metros. Estos datos se pueden emplear para la actualización de las elevaciones de la malla de cálculo o directamente para su creación a partir de la funcionalidad GDAL de GiD.

La posibilidad de exportar los resultados de Iber a archivos Shapefile ha permitido la integración con sistemas BIM. La riqueza de los archivos BIM, p.ej. geojson, permite clasificar y categorizar las manchas de inundación por regiones, municipios, poblaciones, calles, edificios, etc. Esta información geoespacial, combinada con los resultados hidráulicos, permite, entre otras cosas, calcular la profundidad media de agua en cada parcela o edificio. La afección de la inundación no solo se limita a edificios, sino que también puede aplicarse a otros puntos vulnerables como torres de alta tensión, vías de comunicación, etc., y todo ello es visualmente posible mediante una representación tridimensional de todos los elementos que se desee incluir en BIM.

Por otro lado, los cambios aplicados en el flujo de trabajo de la opción ‘brecha’ le otorgan nuevas funciones. Igual que sucede con la opción ‘culverts’ de Iber (Bladé *et al.*, 2019b), las brechas se integran en un flujo de trabajo más sencillo y versátil. Ahora es posible implementar tantas brechas como se desee –incluso importarlas desde un archivo– y activarlas o desactivarlas en función de las necesidades de cada escenario de cálculo. Esto permite, por un lado, la posibilidad de hacer análisis multi-escenario (Sanz-Ramos *et al.*, 2023b) y, por otro lado, elimina la necesidad de crear un modelo por cada brecha.

Finalmente, la generación de informes agiliza enormemente la gestión y análisis de resultados y es, además, un paso hacia la automatización de procesos con Iber. Los datos necesarios para la generación de informes, que por el momento son de carácter ilustrativo, pueden también integrarse en un flujo de análisis automatizado que permita proponer una clasificación de acuerdo a los criterios de la Guía Técnica. Los nuevos requisitos de la Guía Técnica contemplan no solo afecciones tipo ‘grave’ o ‘no grave’ de acuerdo a los criterios de peligrosidad del RD 9/2008, sino también afecciones a servicios esenciales (suministro y recogida de aguas, infraestructuras de transporte y comunicación, sistema eléctrico y elementos sanitarios), daños materiales (propiedades industriales, agrícolas, rústicas e infraestructuras) y aspectos medioambientales, histórico-artísticos y culturales (parques naturales, edificios históricos, etc.). Para elementos puntuales, la aplicación del criterio de peligrosidad del RD 9/2008 es inmediata, y ya se pueden contemplar con Iber. Para elementos superficiales, la nueva Guía Técnica proporciona unos umbrales mínimos de zona inundable, por lo que todavía es necesario extraer la información de Iber para conocer si la afección cumple con los criterios de peligrosidad.

## Nuevas metodologías para la formación de brechas

Iber ya incorpora dos metodologías para la formación de la brecha: una siguiendo los criterios de la Guía Técnica de 1996; y otra, más genérica, en la que se define la forma de la brecha como un trapecio. Salvo excepciones, como sería el caso de rotura

por sobrevertido, que resulta poco común en el ámbito de balsa de riego porque no tienen aportación de agua externa (p.ej. cauces de río), ambas metodologías se muestran como procesos suficientes para describir el tipo de rotura del dique de una balsa. Sin embargo, la nueva Guía Técnica de 2021 proporciona dos nuevas metodologías para el cálculo de los parámetros de la brecha. Por tanto, al igual que ha sucedido con otras funcionalidades, nuevos desarrollos en Iber en materia de clasificación de presas y balsas deben ir encaminados a cumplir con la normativa vigente, no solo a nivel estatal, sino también a nivel mundial. Esto haría de Iber una herramienta más versátil.

En este sentido, cabe destacar que existen tipos de rotura que, por su geometría y evolución, son complejos de reproducir con modelos numéricos bidimensionales. Este sería el caso, por ejemplo, de la rotura por erosión interna o tubificación. En estos casos, se podrían emplear fórmulas para calcular el hidrograma generado por la rotura e implementarlo en Iber como condición de entrada de agua al modelo. Sin embargo, hay otros procesos cuya relevancia no se han tenido en cuenta hasta la fecha, como sería el caso de la formación de una brecha en un dique por el desplazamiento del mismo. Un claro ejemplo lo tenemos en la rotura de la balsa de relaves mineros de Aznalcóllar (Alonso, 2021; Alonso y Gens, 2006a, 2006b; Gens y Alonso, 2006; Sanz-Ramos *et al.*, 2022a).

La implementación de un hidrograma de vertido tras la formación del dique resulta de implementación inmediata. Si bien estos hidrogramas se suelen calcular en base a las características geométricas de la balsa/dique, la existencia de gran variedad de formulaciones propuestas por distintos autores dificulta su elección y, por tanto, la implementación directa en Iber. Es por ello que futuros desarrollos deberían, tal como sucede ahora, dejar libertad al/la usuario/a para que escoja la formulación que desee e implemente el hidrograma calculado como condición de contorno de entrada. Esto le da mayor versatilidad a la herramienta numérica, siendo así de utilidad a nivel mundial.

Con el objetivo de cubrir un mayor número de tipologías de rotura, a modo de ejemplo, se podría implementar en Iber una nueva metodología que permitiera considerar la formación de la brecha mediante la lectura de rasters de topografía. Este método proporcionaría, entre otros, la posibilidad de generar brechas por deslizamiento de uno de los diques (Figura 5), así como

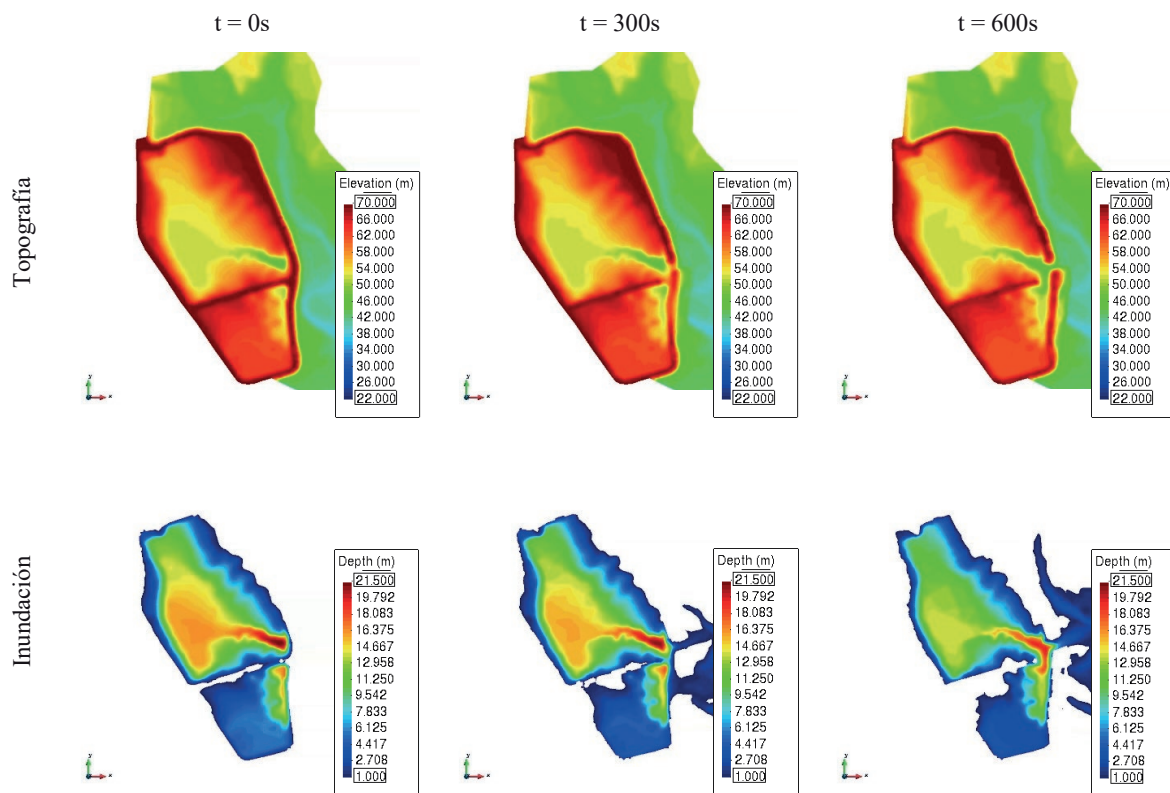

**Figura 5** | Ejemplo del proceso de formación de una brecha por desplazamiento del dique mediante el cambio en la topografía (arriba) y subsiguiente proceso de inundación (abajo) por la formación de una brecha.

la definición de casi cualquier tipo de geometría de brecha que evolucione a lo largo del tiempo (Vahedifard *et al.*, 2017). En estos casos sería necesario disponer de datos topográficos pre- y pos-rotura.

## Base de datos de usos del suelo a nivel mundial

La realización de estudios de inundabilidad mediante herramientas de modelización hidráulica requiere, necesariamente, la definición del parámetro o parámetros para caracterizar los esfuerzos tensionales entre el fluido en movimiento y el terreno. En Iber, esto se evalúa mediante la fórmula de Manning y se asigna mediante el concepto de ‘Usos del suelo’, que pueden ser o no espacialmente distribuido.

El desarrollo y despliegue del sistema nacional de cartografía de zonas inundables (SNCZI) supuso un cambio de paradigma para con la selección de los usos del suelo, ya que antes no existían criterios homogéneos ni para su definición espacial ni para la asignación del valor del coeficiente de Manning correspondiente a cada uso. La publicación de la ‘Guía metodológica para el desarrollo del sistema nacional de cartografía de zonas inundables’ (MAGRAMA, 2011) plasmó estos nuevos criterios.

Atendiendo a la descripción de la Guía Metodológica del SNCZI, y a que ésta se había desarrollado en base al proyecto de usos del suelo a nivel europeo CORINE Land Cover en su versión 2000 (EEA, 2000), actualmente Iber ya integra los usos del suelo del CORINE en su base de datos. Esta integración se basó en criterios hidráulicos, ya que muchos de los usos del suelo descritos tienen particularidades comunes desde el punto de vista hidráulico y, por tanto, se puede asignar un único valor del coeficiente de rugosidad.

Todo ello permite, por un lado, generar modelos de rotura de presas y balsas para la evaluación del proceso de inundación acorde con las recomendaciones de la Guía Metodológica del SNCZI y, por otro lado, proporcionar una base de datos compatible con la descripción de usos del suelo de carácter distribuida y actualizable según el proyecto CORINE Land Cover que se realiza a nivel europeo. Esta información, que se puede descargar gratuitamente, adaptable fácilmente con cualquier entorno GIS y, además, está en continuo desarrollo y mejora, fue la que se utilizó en el proyecto ACROPOLIS.

A pesar del avance que supone la homogeneización de datos de partida para con los estudios de inundabilidad, la utilización del CORINE como base de datos para la definición del coeficiente de rugosidad se encuentra limitada por el desarrollo en un ámbito concreto. Si bien serían fácilmente extrapolables a nivel europeo, dada la cobertura del proyecto CORINE, todavía no es posible emplear, con garantías y de forma homogénea, una base de datos de usos del suelo a nivel mundial.

---

## CONCLUSIONES

Los desarrollos realizados en la herramienta de modelización numérica Iber han sido un elemento esencial y de carácter transversal para el desarrollo del proyecto ACROPOLIS, cuyo objetivo principal fue la digitalización y optimización del procedimiento para la clasificación de balsas frente al riesgo potencial causado por un eventual fallo o mal funcionamiento.

Los avances en Iber han ido encaminados, por un lado, a desarrollar una herramienta de pre-clasificación de balsas en base a técnicas de *machine learning*, cuyo nivel de confianza es superior al 80%. El cálculo masivo e intensivo de casos de estudio para alimentar esta nueva herramienta requirió adaptar el código de Iber mediante técnicas de computación de alto rendimiento y, en concreto, el uso de tarjetas gráficas. Esto ha permitido no solo reducir los tiempos de computación en varios órdenes de magnitud obteniendo aceleraciones superiores a 85x, sino también facilitar la generación de modelos numéricos de mayor detalle y resolución con tiempos de cálculo asequibles. Se han realizado mejoras en la interfaz gráfica de Iber, GiD, con el fin de mejorar la usabilidad de las nuevas herramientas y procesos. Los cambios en la estructura de la opción ‘brecha’ le proporciona a Iber mayor versatilidad y agilidad en todo el flujo de trabajo. La generación de informes automática es un paso hacia la automatización de procesos de análisis de resultados necesarios tras el cálculo. Finalmente, la integración de Iber con GIS y BIM se ha mejorado sustancialmente.

Todos estos avances ofrecen mayor versatilidad para con el uso de la herramienta de modelización numérica Iber para la realización de estudios de clasificación de balsas. También pueden servir como base para futuros desarrollos adaptando la

herramienta para incorporar nuevas geometrías de la brecha, nuevas metodologías para el análisis de resultados y el uso de Iber en estudios a nivel internacional con el empleo de usos del suelo espacialmente distribuidos y criterios de peligrosidad de regiones específicas.

---

## AGRADECIMIENTOS

Este trabajo fue parcialmente financiado por el Ministerio de Ciencia, Innovación y Universidades de España a través de los proyectos ACROPOLIS (RTC2019-007343-5), TRISTAN (RTI2018-094785-B-I00) y DOLMEN (PID2021-122661OB-I00), así como por el Ministerio de Economía y Competitividad de España, a través del “Programa Severo Ochoa para Centros de Excelencia en I+D” (CEX2018-000797-S), y por la Generalitat de Catalunya a través del Programa CERCA.

Los autores agradecen a la “Junta Central de Usuarios del Vinalopó, L’Alacantí y Consorcio de Aguas de la Marina Baja” (JCU) por su interés en el Proyecto ACROPOLIS, así como por su colaboración y generoso trabajo en la búsqueda de información. También agradecemos a la “Comunidad de Regantes de Huerta y Partidas de Villena” y a ARVUM, quienes nos proporcionaron la información del caso de estudio ‘El Rubial’. Por último, agradecemos a V.J. Richart, técnico de JCU, por su interés en el proyecto y sus desarrollos.

---

## REFERENCIAS

- ACA. 2014. Criteris d’interpretació de la Guia tècnica de Classificació de preses en funció del risc potencial. Agència Catalana de l’Aigua, Generalitat de Catalunya.
- Alonso, E.E. 2021. The Failure of the Aznalcóllar Tailings Dam in SW Spain. *Mine Water Environ.* 40, 209–224. <https://doi.org/10.1007/s10230-021-00751-9>
- Alonso, E.E., Gens, A., 2006a. Aznalcóllar dam failure. Part 1: Field observations and material properties. *Géotechnique*, 56, 165–183. <https://doi.org/10.1680/geot.2006.56.3.165>
- Alonso, E.E., Gens, A. 2006b. Aznalcóllar dam failure. Part 3: Dynamics of the motion. *Géotechnique*, 56, 203–210. <https://doi.org/10.1680/geot.2006.56.3.203>
- Anta-Álvarez, J., Bermúdez, M., Cea, L., Suárez, J., Ures, P., Puertas, J. 2015. Modelización de los impactos por DSU en el río Miño (Lugo). *Ingeniería del Agua*, 19(2), 105–116. <https://doi.org/10.4995/ia.2015.3648>
- Aranda, J.Á., Beneyto, C., Sánchez-Juny, M., Bladé, E. 2021. Efficient Design of Road Drainage Systems. *Water*, 13, 1661. <https://doi.org/10.3390/w13121661>
- Aranda, J.Á., Sánchez-Juny, M., Sanz-Ramos, M., Beneyto, C. 2023. Design of Drainage Downspouts Systems over a Road Embankment. *Water*, 15, 3529. <https://doi.org/10.3390/w15203529>
- Bermúdez, M., Farfán, J.F., Willems, P., Cea, L. 2021. Assessing the Effects of Climate Change on Compound Flooding in Coastal River Areas. *Water Resour. Res.*, 57. <https://doi.org/10.1029/2020WR029321>
- Bladé, E., Cea, L., Corestein, G. 2014a. Numerical modelling of river inundations [in Spanish]. *Ingeniería del Agua*, 18(1), 71–82. <https://doi.org/10.4995/ia.2014.3144>
- Bladé, E., Cea, L., Corestein, G., Escolano, E., Puertas, J., Vázquez-Cendón, E., Dolz, J., Coll, A. 2014b. Iber: river flow numerical simulation tool [in Spanish]. *Rev. Int. Métodos Numéricos para Cálculo y Diseño en Ing.*, 30, 1–10. <https://doi.org/10.1016/j.rimni.2012.07.004>

- Bladé, E., Sánchez-Juny, M., Arbat, M., Dolz, J. 2019a. Computational Modeling of Fine Sediment Relocation Within a Dam Reservoir by Means of Artificial Flood Generation in a Reservoir Cascade. *Water Resour. Res.*, 55, 3156–3170. <https://doi.org/10.1029/2018WR024434>
- Bladé, E., Sanz-Ramos, M., Dolz, J., Expósito-Pérez, J., Sánchez-Juny, M. 2019b. Modelling flood propagation in the service galleries of a nuclear power plant. *Nucl. Eng. Des.*, 352, 110180. <https://doi.org/10.1016/j.nucengdes.2019.110180>
- BOE-A-1995-3865, 1995. Resolución de 31 de enero de 1995, de la Secretaría de Estado de interior, por la que se dispone la publicación del Acuerdo del Consejo de Ministros por el que se aprueba la Directriz Básica de Planificación de Protección Civil ante el Riesgo de Inundación. Boletín Oficial del Estado. núm. 38, 14 febrero 1995, páginas 4846 a 4858. Minist. Justicia e Inter. 13.
- BOE-A-1996-7319, 1996. Orden de 12 de marzo de 1996 por la que se aprueba el Reglamento Técnico sobre Seguridad de Presas y Embalses. Boletín Oficial del Estado. núm. 78, 30 marzo 1996, páginas 12244 a 12254. Minist. Obras Públicas, Transp. y Medio Ambient. 12244–12254.
- BOE-A-2008-755, 2008. Real Decreto 9/2008, de 11 de enero, por el que se modifica el Reglamento del Dominio Público Hidráulico, aprobado por el Real Decreto 849/1986, de 11 de abril. Boletín Oficial del Estado núm. 14, 16 enero 2008, páginas 3141 a 3149. Minist. la Pres. 9.
- BOE-A-2010-11184, 2010. Real Decreto 903/2010, de 9 de julio, de evaluación y gestión de riesgos de inundación. Boletín Oficial del Estado. núm. 171, 15 julio 2010, páginas 61954 a 61967. Minist. la Pres. 14.
- Bonakdari, H., Moradi, F., Ebtehaj, I., Gharabaghi, B., Sattar, A.A., Azimi, A.H., Radecki-Pawlik, A. 2020. A Non-Tuned Machine Learning Technique for Abutment Scour Depth in Clear Water Condition. *Water*, 12, 301. <https://doi.org/10.3390/w12010301>
- Brath, A., Montanari, A., Moretti, G. 2006. Assessing the effect on flood frequency of land use change via hydrological simulation (with uncertainty). *J. Hydrol.*, 324, 141–153. <https://doi.org/10.1016/j.jhydrol.2005.10.001>
- Cea, L., Bermúdez, M., Puertas, J., Bladé, E., Corestein, G., Escolano, E., Conde, A., Bockelmann-Evans, B., Ahmadian, R. 2016. IberWQ: new simulation tool for 2D water quality modelling in rivers and shallow estuaries. *J. Hydroinformatics*, 18, 816–830. <https://doi.org/10.2166/hydro.2016.235>
- Cea, L., Bladé, E. 2015. A simple and efficient unstructured finite volume scheme for solving the shallow water equations in overland flow applications. *Water Resour. Res.*, 51, 5464–5486. <https://doi.org/10.1002/2014WR016547>
- Cea, L., Bladé, E., Corestein, G., Fraga, I., Espinal, M., Puertas, J. 2014. Comparative analysis of several sediment transport formulations applied to dam-break flows over erodible beds, in: *EGU General Assembly 2014*. 27 April – 02 May 2014, Vienna, Austria.
- CEDEX, 2020. Manual CEDEX\_LAZtoMDT.v.1.0.
- Coll, A., Pasenau, M., Escolano, E., Perez, J.S., Melendo, A., Monros, A., Gárate, J. 2018. [www.gidhome.com](http://www.gidhome.com).
- de Cea, J.C. 2021. Evolución de la normativa en seguridad de balsas de riego, in: *Jornada Sobre La Gestión de La Seguridad En Balsas de Riego*. MAPAMA, p. 64.
- Díez-Herrero, A., Garrote, J. 2020. Flood Risk Analysis and Assessment, Applications and Uncertainties: A Bibliometric Review. *Water*, 12, 24. <https://doi.org/10.3390/w12072050>
- DOUE-L-2007-82010, 2007. Directiva 2007/60/CE del Parlamento Europeo y del Consejo, de 23 de octubre de 2007, relativa a la evaluación y gestión de los riesgos de inundación.
- EEA, 2000. CORINE Land Cover technical guide - Addendum 2000. European Environmental Agency Technical report No 40. Copenhagen, Denmark.
- Farfán, J.F., Cea, L. 2022. Improving the predictive skills of hydrological models using a combinatorial optimization algorithm and artificial neural networks. *Model. Earth Syst. Environ.*, 9, 1103–1118 <https://doi.org/10.1007/s40808-022-01540-1>

- Farfán, J.F., Cea, L. 2021. Coupling artificial neural networks with the artificial bee colony algorithm for global calibration of hydrological models. *Neural Comput. Appl.*, 33, 8479–8494 <https://doi.org/10.1007/s00521-020-05601-3>
- Fuentes Mariles, Ó.A., Cruz Gerón, J.A., Rivera Díaz, C., Luna Cruz, F., González Prado, J. 2010. Caracterización Experimental de Ruptura de Diques, in: *XXIV Congreso Latinoamericano de Hidráulica*, Punta Del Este, Uruguay. UNESCO, p. 226.
- García-Alén, G., García-Feal, O., Cea, L., Puertas, J. 2023. Implementación de embalses en cálculos hidrológicos con Iber. *Ingeniería del Agua*, 27(1), 59–72. <https://doi.org/10.4995/ia.2023.18750>
- García-Feal, O., González-Cao, J., Gómez-Gesteira, M., Cea, L., Domínguez, J., Formella, A. 2018. An Accelerated Tool for Flood Modelling Based on Iber. *Water*, 10, 1459. <https://doi.org/10.3390/w10101459>
- Gens, A., Alonso, E.E. 2006. Aznalcóllar dam failure. Part 2: Stability conditions and failure mechanism. *Géotechnique*, 56, 185–201. <https://doi.org/10.1680/geot.2006.56.3.185>
- Hooshyaripor, F., Tahershamsi, A., Behzadian, K. 2015. Estimation of peak outflow in dam failure using neural network approach under uncertainty analysis. *Water Resour.*, 42, 721–734. <https://doi.org/10.1134/S0097807815050085>
- ICOLD European Club, 2012. Working group on safety of existing dams.
- IGN, 2022. Digital Elevation Models [WWW Document]. Cent. Descargas. URL <http://centrodedescargas.cnig.es/CentroDescargas/> (accessed 4.26.22).
- Junta de Andalucía. 2010. Inventario de balsas de Andalucía [WWW Document]. Cons. Agric. Ganad. Pesca y Desarro. Sostenible. Junta Andalucía. URL <http://www.ideandalucia.es/catalogo/inspire/srv/api/records/2c106f46-0ae4-4de4-bba5-f0f4399ff75a> (accessed 3.24.23).
- MAGRAMA. 2011. Methodological Guide for the Development of the National Flood Zone Mapping System [in Spanish]. Ministerio de Medio Ambiente y Medio Rural y Marino. Gobierno de España: Madrid, España.
- Martínez-Gomariz, E., Barbero, C., Sanchez-Juny, M., Forero-Ortiz, E., Sanz-Ramos, M. 2023. Dams or ponds classification based on a new criterion to assess potential flood damage to roads in case of failure. *Nat. Hazards*, 117, 625–653. <https://doi.org/10.1007/s11069-023-05875-5>
- MITECO, 2021. Technical guide for the classification of dams [in Spanish]. Ministerio para la transición ecológica y el reto demográfico (MITECO). Madrid, España.
- MMA. 1996. Technical guide for the classification of dams function of the potential risk [in Spanish]. Ministerio de Medio Ambiente. Dirección General de Obras Hidráulicas y Calidad de las Aguas. Madrid, España.
- Morales-Hernández, M., Sharif, M.B., Kalyanapu, A., Ghafoor, S.K., Dullo, T.T., Gangrade, S., Kao, S.-C., Norman, M.R., Evans, K.J. 2021. TRITON: A Multi-GPU open source 2D hydrodynamic flood model. *Environ. Model. Softw.*, 141, 105034. <https://doi.org/10.1016/j.envsoft.2021.105034>
- Motta, M., de Castro Neto, M., Sarmiento, P. 2021. A Mixed Approach for Urban Flood Prediction Using Machine Learning and GIS. *Int. J. Disaster Risk Reduct.*, 56, 102154. <https://doi.org/10.1016/j.ijdr.2021.102154>
- MTERD. 2019. Legislación en materia de seguridad en balsas de riego [WWW Document]. Minist. para la Transic. Ecológica y el Reto Demográfico (MTERD). Curso en diseño, construcción, explotación, Manten. y Segur. balsas riego. URL [https://www.mapa.gob.es/images/es/legislaciondeseguridaddebalsas\\_tcm30-520204.pdf](https://www.mapa.gob.es/images/es/legislaciondeseguridaddebalsas_tcm30-520204.pdf) (accessed 1.19.21).
- Nguyen, D.T. 2023. Operating Multi-Purpose Reservoirs in the Red River Basin: Hydropower Benefit Optimization in Conditions Ensuring Enough Water for Downstream Irrigation. *Sustainability*, 15, 5444. <https://doi.org/10.3390/su15065444>
- NVIDIA. 2022a. NVIDIA CUDA Fortran Programming Guide [WWW Document]. URL <https://docs.nvidia.com/hpc-sdk/compiler/cuda-fortran-prog-guide/> (accessed 2.23.22).

- NVIDIA. 2022b. NVIDIA HPC SDK Version 22.3 Documentation [WWW Document]. URL <https://docs.nvidia.com/hpc-sdk/compilers/> (accessed 2.25.22).
- Orozco Rivas, R., Berezowsky, M. 2000. Brechas en bordos de arcilla formadas por desbordamiento. *Ingeniería del Agua*, 7(3), 255–262. <https://doi.org/10.4995/ia.2000.2848>
- Roy, P., Pal, S.C., Arabameri, A., Rezaie, F., Chakraborty, R., Chowdhuri, I., Saha, A., Malik, S., Das, B. 2021. Climate and land use change induced future flood susceptibility assessment in a sub-tropical region of India. *Soft Comput.*, 25, 5925–5949. <https://doi.org/10.1007/s00500-021-05584-w>
- Ruiz-Villanueva, V., Bladé, E., Sánchez-Juny, M., Martí-Cardona, B., Díez-Herrero, A., Bodoque, J.M. 2014. Two-dimensional numerical modeling of wood transport. *J. Hydroinformatics*, 16, 1077. <https://doi.org/10.2166/hydro.2014.026>
- Ruiz-Villanueva, V., Mazzorana, B., Bladé, E., Bürkli, L., Iribarren-Anacona, P., Mao, L., Nakamura, F., Ravazzolo, D., Rickenmann, D., Sanz-Ramos, M., Stoffel, M., Wohl, E. 2019. Characterization of wood-laden flows in rivers. *Earth Surf. Process. Landforms*, 44, 1694–1709. <https://doi.org/10.1002/esp.4603>
- Sachdeva, S., Bhatia, T., Verma, A.K. 2017. Flood Susceptibility Mapping Using GIS-Based Support Vector Machine and Particle Swarm Optimization: A Case Study in Uttarakhand (India), in: ). In Proceedings of the 2017 8th International Conference on Computing, Communication and Networking Technologies (ICCCNT), 3-7 July; IEEE: Delhi, India, 2017. pp. 1–7. <https://doi.org/10.1109/ICCCNT.2017.8204182>
- Sahoo, D., Yazdi, M.Y., Owen, J.S., White, S.A. 2021. The Basics of Irrigation Reservoirs for Agriculture. <https://doi.org/10.34068/LGPR.01>
- Salazar, F., Toledo, M.A., Oñate, E., Morán, R. 2015. An empirical comparison of machine learning techniques for dam behaviour modelling. *Struct. Saf.*, 56, 9–17. <https://doi.org/10.1016/j.strusafe.2015.05.001>
- Salazar, F., Toledo, M.T., Oñate, E., Suárez, B. 2016. Interpretation of dam deformation and leakage with boosted regression trees. *Eng. Struct.*, 119, 230–251. <https://doi.org/10.1016/j.engstruct.2016.04.012>
- Sánchez-Romero, F.J., Pérez-Sánchez, M., Redón-Santafé, M., Torregrosa Soler, J.B., Ferrer Gisbert, C., Ferrán Gozálviz, J.J., Ferrer Gisbert, A., López-Jiménez, P.A. 2019. Estudio numérico para la elaboración de mapas de inundación considerando la hipótesis de rotura en balsas para riego. *Ingeniería del Agua*, 23(1), 1–18. <https://doi.org/10.4995/ia.2019.8892>
- Sañudo, E., Cea, L., Puertas, J. 2020. Modelling Pluvial Flooding in Urban Areas Coupling the Models Iber and SWMM. *Water (Switzerland)*, 12, 2647. <https://doi.org/https://doi.org/10.3390/w12092647>
- Sanz-Ramos, M., Andrade, C.A., Oller, P., Furdada, G., Bladé, E., Martínez-Gomariz, E. 2021a. Reconstructing the Snow Avalanche of Coll de Pal 2018 (SE Pyrenees). *GeoHazards*, 2, 196–211. <https://doi.org/10.3390/geohazards2030011>
- Sanz-Ramos, M., Bladé, E., Dolz, J., Sánchez-Juny, M. 2022a. Revisiting the Hydraulics of the Aznalcóllar Mine Disaster. *Mine Water Environ.*, 41, 335–356. <https://doi.org/10.1007/s10230-022-00863-w>
- Sanz-Ramos, M., Bladé, E., Dolz, J., Sánchez-Juny, M. 2021b. Aznalcóllar disaster: muds or acid waters? [in Spanish]. *Ingeniería del Agua*, 25(3), 229–239. <https://doi.org/10.4995/ia.2021.15633>
- Sanz-Ramos, M., Bladé, E., Escolano, E. 2020a. Optimization of the Floodplain Encroachment calculation with hydraulic criteria [in Spanish]. *Ingeniería del Agua*, 24(3), 203–218. <https://doi.org/10.4995/ia.2020.13364>
- Sanz-Ramos, M., Bladé, E., González-Escalona, F., Olivares, G., Aragón-Hernández, J.L. 2021c. Interpreting the Manning Roughness Coefficient in Overland Flow Simulations with Coupled Hydrological-Hydraulic Distributed Models. *Water*, 13, 3433. <https://doi.org/10.3390/w13233433>
- Sanz-Ramos, M., Bladé, E., Oller, P., Furdada, G. 2023a. Numerical modelling of dense snow avalanches with a well-balanced scheme based on the 2D shallow water equations. *J. Glaciol.* 1–17. <https://doi.org/10.1017/jog.2023.48>



- Sanz-Ramos, M., Bladé, E., Palau, A., Vericat, D., Ramos-Fuertes, A. 2019. IberHABITAT: assessment of Physical Habitat Suitability and Weighted Usable Area for fishes. Application in the Eume River. *Ribagua*, 6, 158–167. <https://doi.org/10.1080/23863781.2019.1664273>
- Sanz-Ramos, M., Bladé, E., Silva-Cancino, N., Salazar, F., López-Gómez, D., Martínez-Gomariz, E. 2023b. A Probabilistic Approach for Off-Stream Reservoir Failure Flood Hazard Assessment. *Water (Switzerland)*, 15, 2202. <https://doi.org/10.3390/w15122202>
- Sanz-Ramos, M., Cea, L., Bladé, E. 2022b. IberAula - Dissemination [WWW Document]. URL <https://iberaula.es/56/iber-community/dissemination> (accessed 1.27.22).
- Sanz-Ramos, M., López-Gómez, D., Bladé, E., Dehghan-Souraki, D. 2023c. A CUDA Fortran GPU-parallelised hydrodynamic tool for high-resolution and long-term eco-hydraulic modelling. *Environ. Model. Softw.*, 161, 105628. <https://doi.org/10.1016/j.envsoft.2023.105628>
- Sanz-Ramos, M., Martí-Cardona, B., Bladé, E., Seco, I., Amengual, A., Roux, H., Romero, R. 2020b. NRCS-CN Estimation from Onsite and Remote Sensing Data for Management of a Reservoir in the Eastern Pyrenees. *J. Hydrol. Eng.*, 25, 05020022. [https://doi.org/10.1061/\(ASCE\)HE.1943-5584.0001979](https://doi.org/10.1061/(ASCE)HE.1943-5584.0001979)
- Sanz-Ramos, M., Olivares Cerpa, G., Bladé i Castellet, E. 2020. Metodología para el análisis de rotura de presas con aterramiento mediante simulación con fondo móvil. *Ribagua*, 7, 1–10. <https://doi.org/10.1080/23863781.2019.1705198>
- Sanz-Ramos, M., Olivares, G., Bladé, E. 2022c. Experimental characterization and two-dimensional hydraulic-hydrologic modelling of the infiltration process through permeable pavements. *Rev. Int. Métodos Numéricos para Cálculo y Diseño en Ing.*, 38. <https://doi.org/10.23967/j.rimni.2022.03.012>
- Schultz, B. 2008. Water management and flood protection of the polders in the Netherlands under the impact of climate change and man-induced changes in land use. *J. Water L. Dev.*, 12, 71–94. <https://doi.org/10.2478/v10025-009-0007-8>
- SEIASA, 2021. Criterios de diseño para la seguridad en balsas de riego.
- Silva-Cancino, N., Salazar, F., Sanz-Ramos, M., Bladé, E. 2022. A Machine Learning-Based Surrogate Model for the Identification of Risk Zones Due to Off-Stream Reservoir Failure. *Water*, 14, 2416. <https://doi.org/10.3390/w14152416>
- Singh, R.B., Singh, S. 2011. Rapid urbanization and induced flood risk in Noida, India. *Asian Geogr.*, 28, 147–169. <https://doi.org/10.1080/10225706.2011.629417>
- Soler Guitart, J., Gómez Valentín, M., Rodellar Benedé, J. 2010. Propuesta de operación mediante control pasivo del canal Xerta-Sénia. *Ingeniería del Agua*, 17(1), 69–87. <https://doi.org/10.4995/ia.2010.2962>
- Vahedifard, F., AghaKouchak, A., Ragno, E., Shahrokhbabadi, S., Mallakpour, I. 2017. Lessons from the Oroville dam. *Science*, 355(6330), 1139–1140. <https://doi.org/10.1126/science.aan0171>
- Zhu, Yang, Liu, Wen, Zhang, Chang, 2019. Hydrological Responses to the Future Climate Change in a Data Scarce Region, Northwest China: Application of Machine Learning Models. *Water*, 11, 1588. <https://doi.org/10.3390/w11081588>
